# Supplementary material for: Synthesis of star-shaped poly(lactide)s, poly(valerolactone)s and poly(caprolactone)s via ROP catalyzed by N-donor tin(ii) cations and comparison of their wetting properties with linear analogues
Source: Royal Society of Chemistry journal article supplement (doi:10.1039/d4ra03515a), 2024-01-01
Supplement: d4ra03515a1.pdf [file d4ra03515a1.pdf]

ESI for:

**Synthesis of Star-shaped Poly(lactide), Poly(valerolactone) and Poly(caprolactone) via ROP Catalyzed by N-donor tin(II) Cations and Comparison of its Wetting Properties with Linear Analogues**

Miroslav Novák\*, Yaraslava Milasheuskaya, Michael Srb, Štěpán Podzimek, Marek Bouška and Roman Jambor

**Table of contents:**

|                                                                                                                                                                 |    |
|-----------------------------------------------------------------------------------------------------------------------------------------------------------------|----|
| <b>Table S1.</b> The WCAs of tested linear and star-shaped polymers.                                                                                            | S2 |
| <b>Table S2.</b> The WCAs of the formulations containing <b>SnBO-1</b> and <b>SnBO-2</b> .                                                                      | S2 |
| <b>Figure S1.</b> A graphical representation of the WCA of tested formulations containing <b>SnBO-1</b> and <b>SnBO-2</b> . <b>B)</b> Screens of water droplet. | S3 |

**Table S1.** The WCAs of tested linear and star-shaped polymers.

| <i>polymer</i> | <i>concentration [% w/w]</i> |                    |                     |
|----------------|------------------------------|--------------------|---------------------|
|                | <b>0.5</b>                   | <b>1</b>           | <b>2</b>            |
| <b>PLA-L</b>   | 73.0 ( $\pm 1.2$ )           | 88.9 ( $\pm 3.6$ ) | 97.2 ( $\pm 1.0$ )  |
| <b>PCL-L</b>   | 78.4 ( $\pm 0.7$ )           | 81.3 ( $\pm 2.2$ ) | 101.4 ( $\pm 1.0$ ) |
| <b>PVL-L</b>   | 79.1 ( $\pm 1.6$ )           | 78.3 ( $\pm 1.6$ ) | 74.6 ( $\pm 1.7$ )  |
|                |                              |                    |                     |
| <b>PLA-DPE</b> | 76.9 ( $\pm 1.0$ )           | 78.3 ( $\pm 1.6$ ) | 79.9 ( $\pm 1.2$ )  |
| <b>PCL-DPE</b> | 81.8 ( $\pm 1.2$ )           | 82.8 ( $\pm 1.2$ ) | 103.5 ( $\pm 3.1$ ) |
| <b>PVL-DPE</b> | 72.1 ( $\pm 1.2$ )           | 73.8 ( $\pm 0.8$ ) | 76.0 ( $\pm 2.2$ )  |

**Table S2.** The WCAs of the formulations containing **SnBO-1** and **SnBO-2**.

| <i>polymeric matrix (WCA)</i> | <i>SnBO-1:polymeric matrix [w/w]</i> |                     |
|-------------------------------|--------------------------------------|---------------------|
|                               | <b>0.5:1</b>                         | <b>1:1</b>          |
| <b>PLA-L (97.2)</b>           | 74.6 ( $\pm 1.2$ )                   | 79.2 ( $\pm 0.9$ )  |
| <b>PCL-L (101.4)</b>          | 94.0 ( $\pm 1.6$ )                   | 90.7 ( $\pm 1.3$ )  |
| <b>PVL-L (79.1)</b>           | 85.7 ( $\pm 0.8$ )                   | 93.1 ( $\pm 1.1$ )  |
|                               |                                      |                     |
| <b>PLA-DPE (79.9)</b>         | 96.5 ( $\pm 1.4$ )                   | 94.8 ( $\pm 1.5$ )  |
| <b>PCL-DPE (103.5)</b>        | 92.1 ( $\pm 1.9$ )                   | 97.3 ( $\pm 1.3$ )  |
| <b>PVL-DPE (76.0)</b>         | 78.0 ( $\pm 2.0$ )                   | 93.6 ( $\pm 1.7$ )  |
|                               |                                      |                     |
| <i>polymeric matrix (WCA)</i> | <i>SnBO-2:polymeric matrix [w/w]</i> |                     |
|                               | <b>0.5:1</b>                         | <b>1:1</b>          |
| <b>PLA-L (97.2)</b>           | 73.9 ( $\pm 1.2$ )                   | 94.5 ( $\pm 1.5$ )  |
| <b>PCL-L (101.4)</b>          | 97.4 ( $\pm 0.8$ )                   | 100.0 ( $\pm 1.1$ ) |
| <b>PVL-L (79.1)</b>           | 99.0 ( $\pm 1.4$ )                   | 100.3 ( $\pm 0.8$ ) |
|                               |                                      |                     |
| <b>PLA-DPE (79.9)</b>         | 85.0 ( $\pm 1.9$ )                   | 96.5 ( $\pm 1.5$ )  |
| <b>PCL-DPE (103.5)</b>        | 96.6 ( $\pm 1.5$ )                   | 97.7 ( $\pm 1.6$ )  |
| <b>PVL-DPE (76.0)</b>         | 89.6 ( $\pm 1.2$ )                   | 95.0 ( $\pm 0.9$ )  |

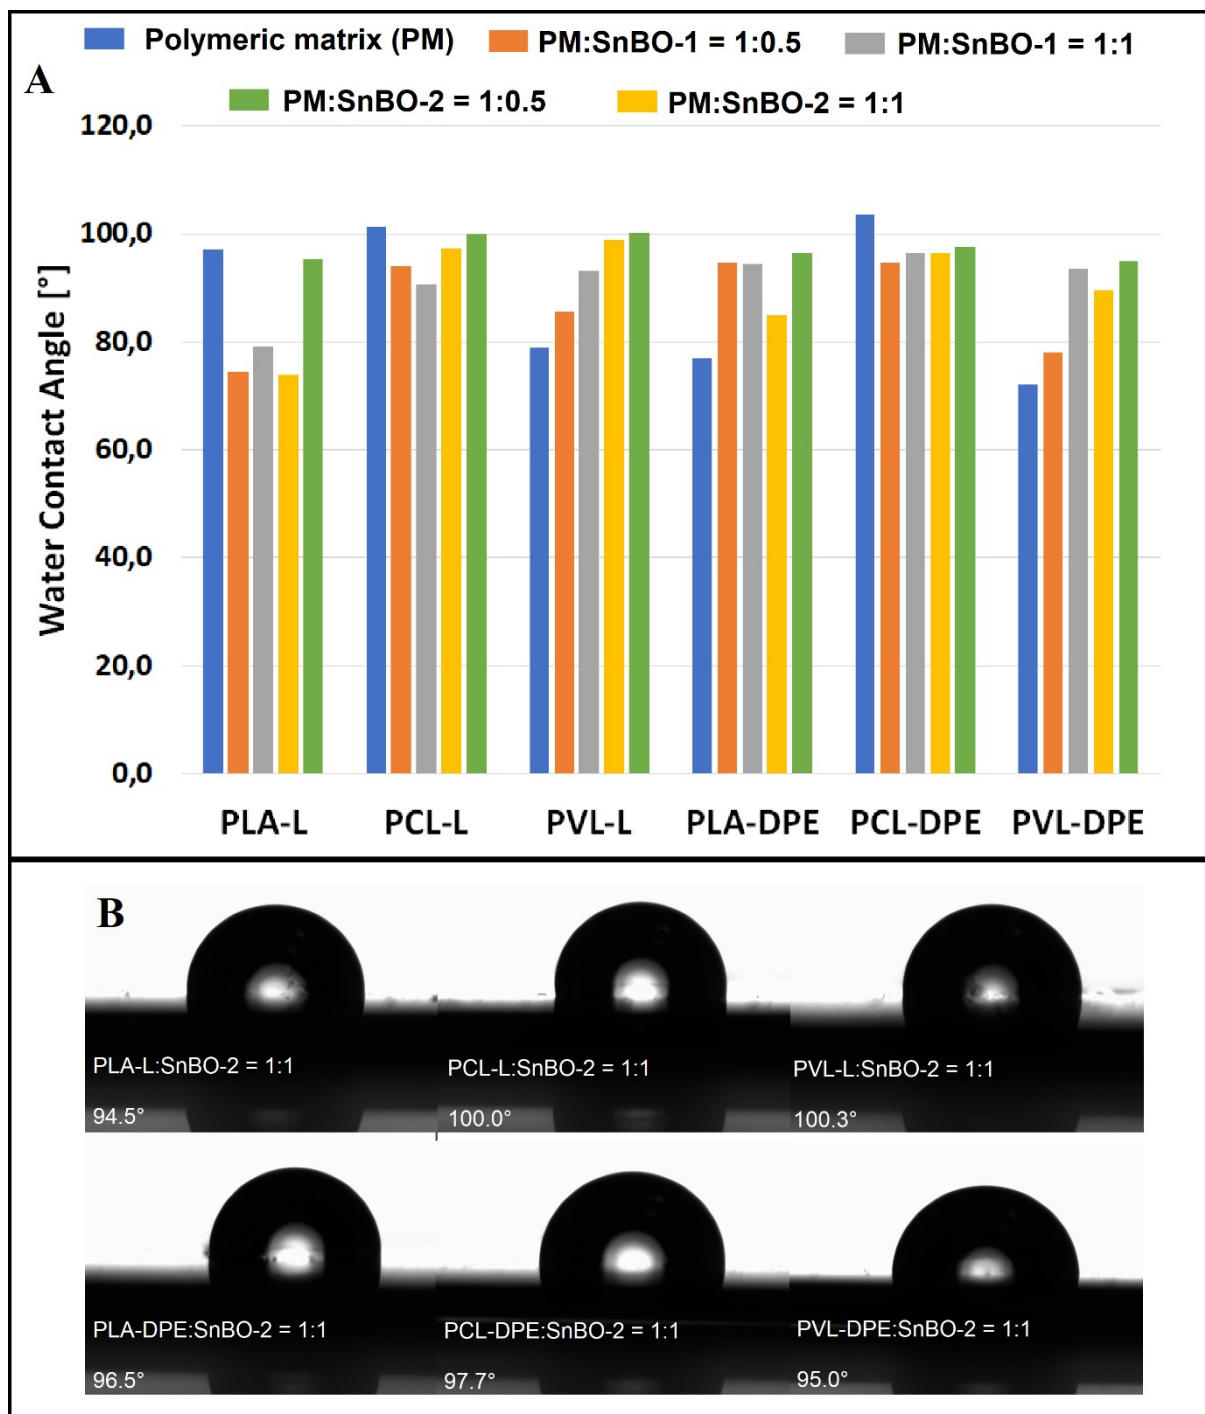

**Figure S1.** A graphical representation of the WCA of tested formulations containing **SnBO-1** and **SnBO-2**. **B)** Screens of water droplet.
